# Supplementary material
Source: publisher figshare collection journal article supplement (https://frontiersin.figshare.com/ndownloader/files/15220787)
Supplement: Supplementary file [file 15220787]

## *Supplementary Material*

# Improved Conditions for the Visible-light Driven Hydrocarboxylation by Rh(I) and Photoredox Dual Catalysts based on the Mechanistic Analyses

*Kei Murata, Nobutsugu Numasawa, Katsuya Shimomaki, Jun Takaya,  
and Nobuharu Iwasawa\**

*Department of Chemistry, Tokyo Institute of Technology, O-Okayama, Meguro-ku,  
Tokyo 152-8551, Japan*

| Contents                                                                         | Figure, Table                                    | Page     |
|----------------------------------------------------------------------------------|--------------------------------------------------|----------|
| <b>1. Abbreviations</b>                                                          |                                                  |          |
| Abbreviations of the Rh Complexes                                                | Supplementary Table 1                            | S2       |
| <b>2. Experimental Results</b>                                                   |                                                  |          |
| Photochemical Generations of the Rhodium Hydrides                                | Supplementary Figure 1<br>Supplementary Figure 2 | S3<br>S3 |
| Luminescence Quenching Experiment                                                | Supplementary Figure 3                           | S4       |
| Observation of the Reaction Intermediates under Catalytic Conditions             | Supplementary Figure 4                           | S5       |
| <b>3. Theoretical Calculations</b>                                               |                                                  |          |
| Energies and Compositions of the Calculated Triplet Excited States               | Supplementary Table 2                            | S6       |
| Cartesian Coordinates and ZPE Corrected Total Energy of the Optimized Structures | Supplementary Table 3                            | S7       |

## 1 Abbreviations

Supplementary Table 1. Abbreviations of the Rh Complexes.

| Name                          | Simplified structure                               | Abbrev.   | Specific structure                                                                                                                     | Abbrev.  |
|-------------------------------|----------------------------------------------------|-----------|----------------------------------------------------------------------------------------------------------------------------------------|----------|
| Rh(I) monohydride             | $L_nRh^I-H$                                        | <b>A</b>  | $(PPh_3)_3Rh-H$                                                                                                                        | <b>6</b> |
| Rh(I) benzyl                  | $L_nRh^I-CH_2-Ar$<br>( $\sigma$ -benzyl)           | <b>B</b>  | —                                                                                                                                      | —        |
|                               | $L_nRh^I-(\eta^5-C_5H_4CH_2)R$<br>( $\pi$ -benzyl) | <b>B'</b> | 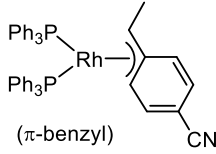<br>( $\pi$ -benzyl)                                 | <b>8</b> |
| Rh(I) carboxylate             | $L_nRh^I-O-C(=O)-CH_2-Ar$                          | <b>C</b>  | <br>$R = Ph$ <b>5</b><br>$Cy$ <b>5'</b>              |          |
|                               |                                                    |           | <br>$R' = 4-CNC_6H_4$ <b>9</b><br>$CO_2Me$ <b>10</b> |          |
| Rh(III) dihydride carboxylate | $H_2Rh^III(L_n)-O-C(=O)-CH_2-Ar$                   | <b>D</b>  | <br>$R = Ph$ <b>7</b><br>$Cy$ <b>7'</b>            |          |

## 2 Experimental Results

### Photochemical Generations of the Rhodium Hydrides

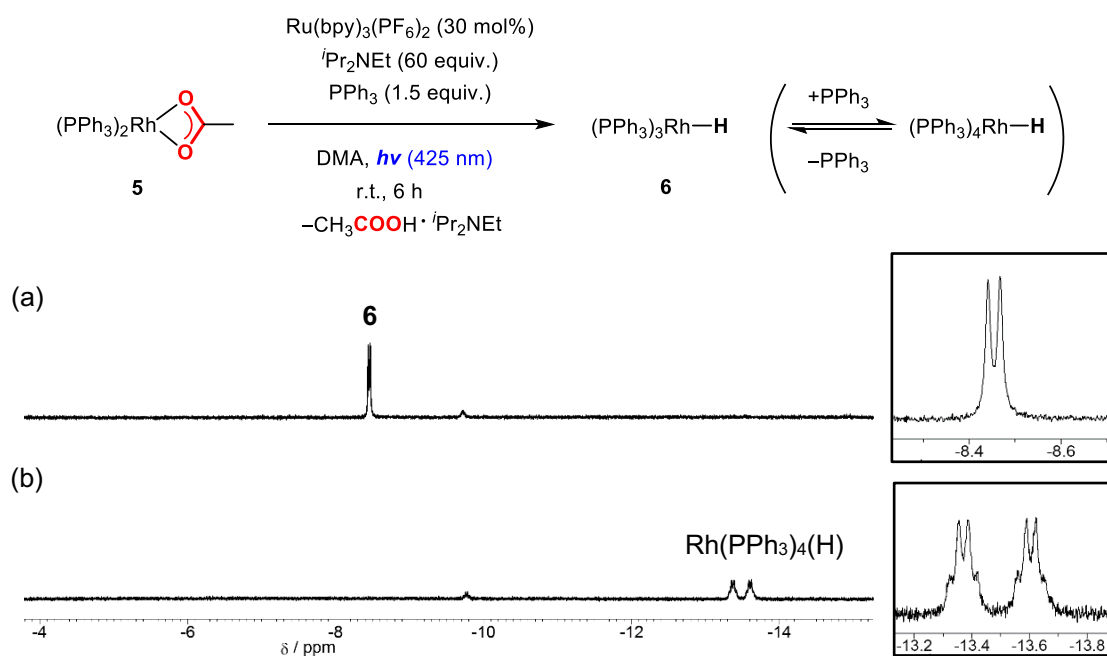

**Supplementary Figure 1.**  $^{31}\text{P}\{^1\text{H}\}$  NMR spectra of the redox-photosensitized reaction of  $\text{Rh(PPh}_3)_2(\text{OAc})$  (**5**) observed at (a) r.t. and (b)  $-90^\circ\text{C}$  (500 MHz,  $\text{THF-}d_8$ , Rh hydride region).

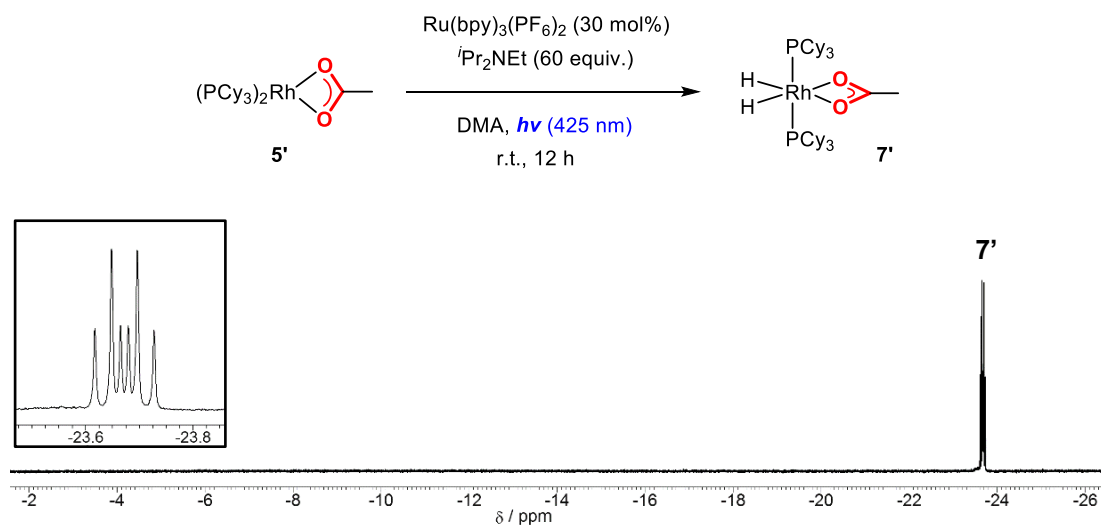

**Supplementary Figure 2.**  $^{31}\text{P}\{^1\text{H}\}$  NMR spectrum of the redox-photosensitized reaction of  $\text{Rh(PCy}_3)_2(\text{OAc})$  (**5'**) observed at r.t. (500 MHz,  $\text{THF-}d_8$ , Rh hydride region).

## Luminescence Quenching Experiment

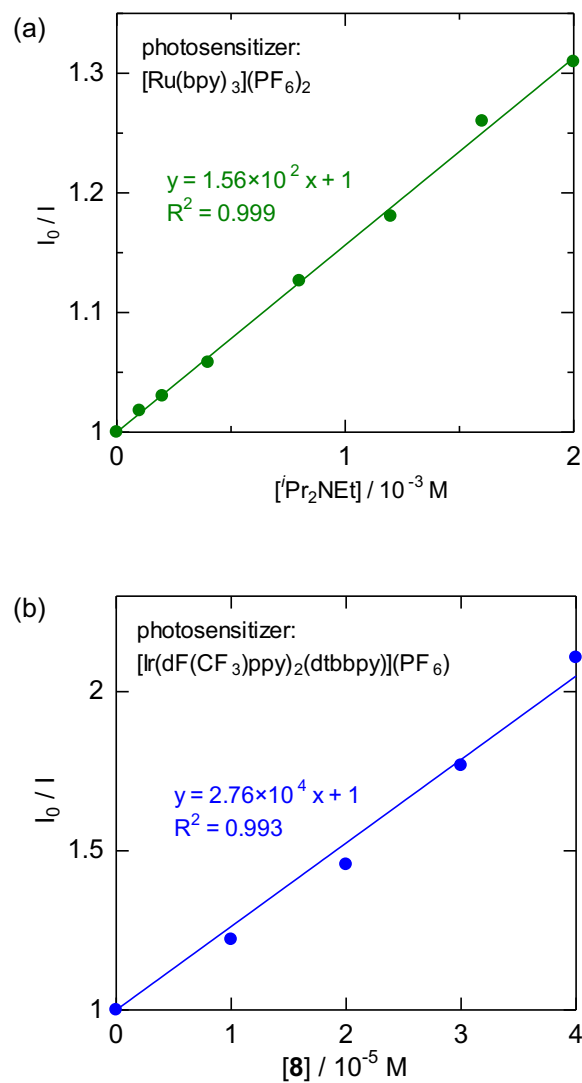

**Supplementary Figure 3.** Stern-Volmer plots of (a)  $[\text{Ru}(\text{bpy})_3](\text{PF}_6)_2$  ( $1.0 \times 10^{-5} \text{ M}$ ,  $\lambda_{\text{ex.}} = 450 \text{ nm}$ ) with  $i\text{Pr}_2\text{NEt}$  and (b)  $[\text{Ir}(\text{dF}(\text{CF}_3)\text{ppy})_2(\text{dtbbpy})](\text{PF}_6)$  ( $1.0 \times 10^{-5} \text{ M}$ ,  $\lambda_{\text{ex.}} = 380 \text{ nm}$ ) with **8** generated *in situ* in deaerated DMF at r.t..

## Observation of the Reaction Intermediates under Catalytic Conditions

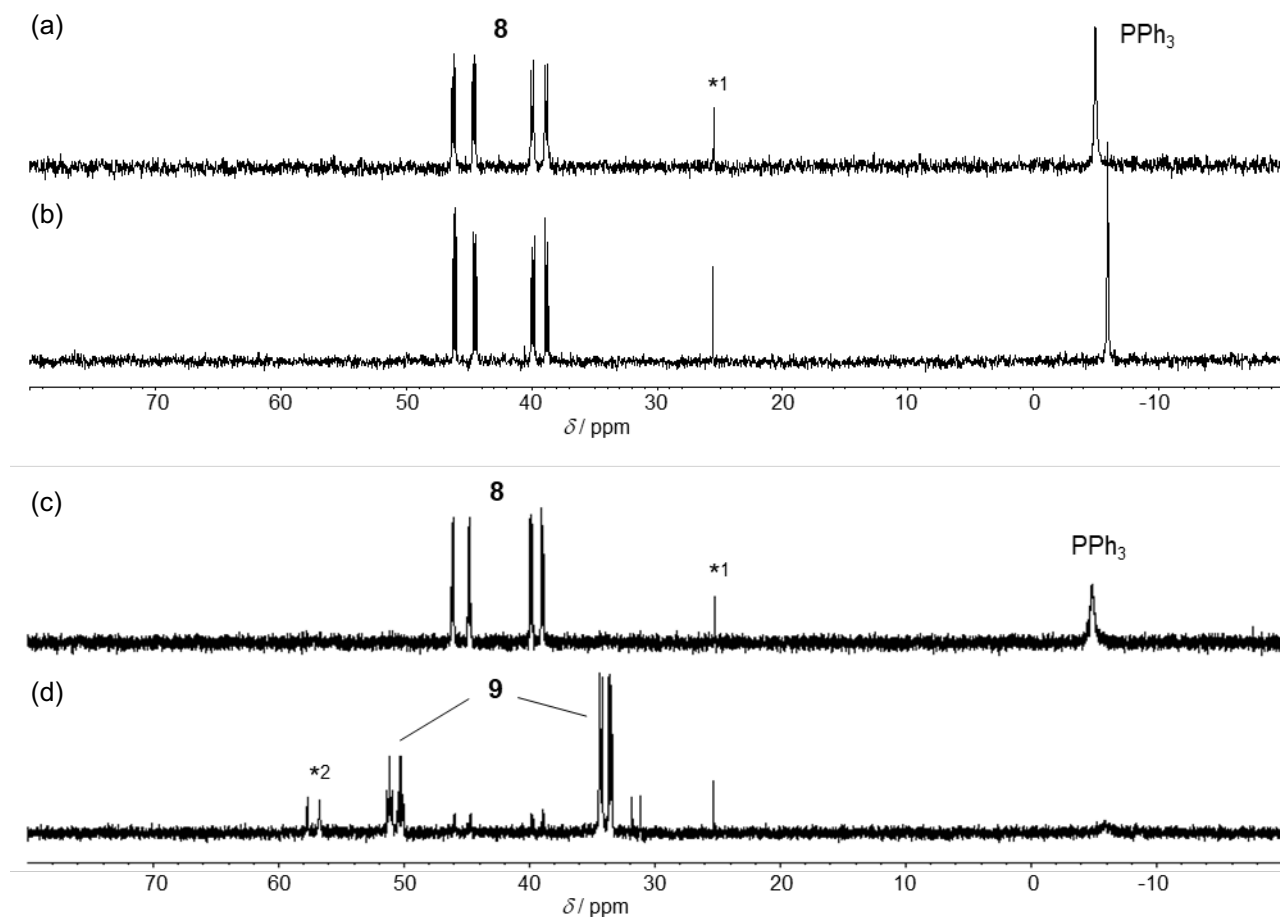

**Supplementary Figure 4.** <sup>31</sup>P{<sup>1</sup>H} NMR spectra of the reaction with BI(OH)H (a) under dark and (b) visible-light irradiation for 30 min (500 MHz, DMA, -15 °C). The bottoms are <sup>31</sup>P{<sup>1</sup>H} NMR spectra of the reaction with *i*Pr<sub>2</sub>NEt (c) under dark and (d) visible-light irradiation for 30 min for comparison (Conditions: Rh(PPh<sub>3</sub>)<sub>3</sub>H (**6**) (3.6 mg, 0.0040 mmol), [Ru(bpy)<sub>3</sub>](PF<sub>6</sub>)<sub>2</sub> (1.0 mg, 0.0012 mmol), *i*Pr<sub>2</sub>NEt (41 μL, 0.24 mmol), 4-cyanostyrene (**1a**) (2.6 μL, 0.020 mmol), DMA (0.6 mL), CO<sub>2</sub> (1 atm), visible light (λ<sub>irr.</sub> = 425 nm), r.t.). \*1(O=)PPh<sub>3</sub> \*2 Rh(PPh<sub>3</sub>)<sub>2</sub>(η<sup>2</sup>-O<sub>2</sub>CCHCH<sub>3</sub>(4-CNC<sub>6</sub>H<sub>4</sub>))

### 3 Theoretical Calculations

**Supplementary Table 2.** Energies and Compositions of the Calculated Excited Triplet States of **8** (Calculated by TD-DFT Based on the  $S_0$  Optimized Geometry, Transition Percentage > 3%)

| State          | $E$<br>[eV] | $E$<br>[ $10^4 \text{ cm}^{-1}$ ] | Major Contributions [%] |                            |
|----------------|-------------|-----------------------------------|-------------------------|----------------------------|
| T <sub>1</sub> | 1.85        | 1.49                              | 88                      | HOMO $\rightarrow$ LUMO    |
|                |             |                                   | 4                       | HOMO $\rightarrow$ LUMO+16 |
| T <sub>2</sub> | 2.19        | 1.77                              | 87                      | HOMO-1 $\rightarrow$ LUMO  |

**Supplementary Table 3.** Cartesian coordinates and ZPE corrected total energy of the optimized structures of **8**(S<sub>0</sub>) and **8**(T<sub>1</sub>).

**8**(S<sub>0</sub>)    E<sub>tot</sub> = -1914.7863 a.u.

|    |           |           |           |   |           |           |           |
|----|-----------|-----------|-----------|---|-----------|-----------|-----------|
| Rh | 0.097049  | -0.749110 | -0.838960 | H | -2.782413 | 3.870999  | 4.002897  |
| P  | 1.385644  | 1.009860  | -0.020756 | C | -2.521421 | 3.442948  | 1.896814  |
| P  | -1.960485 | -0.204368 | -0.014757 | H | -2.607761 | 4.483304  | 1.587177  |
| C  | -0.657622 | -2.395620 | -2.059530 | C | -2.321636 | 2.451554  | 0.931673  |
| C  | 1.457638  | 1.210692  | 1.820019  | H | -2.270336 | 2.742934  | -0.114732 |
| C  | 1.533825  | 0.019335  | 2.563394  | C | -3.236633 | 0.331003  | -1.254226 |
| H  | 1.503890  | -0.939428 | 2.044258  | C | -2.926754 | 0.237573  | -2.619009 |
| C  | 1.646975  | 0.049421  | 3.956466  | H | -1.948559 | -0.138545 | -2.913781 |
| H  | 1.712591  | -0.883850 | 4.513215  | C | -3.849102 | 0.635591  | -3.593743 |
| C  | 1.666651  | 1.276645  | 4.630767  | H | -3.587629 | 0.559034  | -4.647824 |
| H  | 1.747711  | 1.304848  | 5.716070  | C | -5.097873 | 1.137082  | -3.212298 |
| C  | 1.570696  | 2.466525  | 3.900700  | H | -5.816983 | 1.450463  | -3.967281 |
| H  | 1.572218  | 3.425107  | 4.417093  | C | -5.414395 | 1.245953  | -1.851556 |
| C  | 1.471032  | 2.435102  | 2.504225  | H | -6.380485 | 1.643602  | -1.545228 |
| H  | 1.384077  | 3.372838  | 1.961720  | C | -4.490262 | 0.850195  | -0.880529 |
| C  | 1.032896  | 2.684124  | -0.738403 | H | -4.745328 | 0.964827  | 0.171425  |
| C  | -0.028466 | 2.814117  | -1.644743 | C | -2.717400 | -1.674542 | 0.837553  |
| H  | -0.642850 | 1.942684  | -1.870471 | C | -1.859897 | -2.475954 | 1.610675  |
| C  | -0.285600 | 4.036855  | -2.277163 | H | -0.798503 | -2.233097 | 1.655523  |
| H  | -1.111679 | 4.117589  | -2.981769 | C | -2.349189 | -3.586975 | 2.304544  |
| C  | 0.520131  | 5.147351  | -2.006303 | H | -1.669358 | -4.192529 | 2.901784  |
| H  | 0.322407  | 6.100243  | -2.494438 | C | -3.705301 | -3.925468 | 2.219640  |
| C  | 1.596427  | 5.023134  | -1.116767 | H | -4.088151 | -4.795734 | 2.750153  |
| H  | 2.240106  | 5.877672  | -0.915040 | C | -4.563446 | -3.141861 | 1.439581  |
| C  | 1.857811  | 3.798428  | -0.496965 | H | -5.617636 | -3.402169 | 1.358310  |
| H  | 2.725824  | 3.708982  | 0.153861  | C | -4.074399 | -2.020851 | 0.757854  |
| C  | 3.195662  | 0.916328  | -0.453920 | H | -4.759656 | -1.434417 | 0.150824  |
| C  | 4.193681  | 0.605252  | 0.479793  | H | -0.571529 | -1.891088 | -3.028451 |
| H  | 3.940866  | 0.463165  | 1.528148  | C | 0.597769  | -2.810184 | -1.511527 |
| C  | 5.530440  | 0.477467  | 0.077610  | C | -1.901376 | -3.245077 | -1.948791 |
| H  | 6.292337  | 0.235913  | 0.817074  | C | 0.767369  | -3.879499 | -0.559313 |
| C  | 5.886070  | 0.661909  | -1.261889 | C | 1.751012  | -2.003081 | -1.819152 |
| H  | 6.924513  | 0.563618  | -1.573507 | C | 2.999867  | -2.288354 | -1.219206 |
| C  | 4.893669  | 0.979228  | -2.200653 | C | 1.987064  | -4.140394 | 0.011070  |
| H  | 5.157845  | 1.129413  | -3.246215 | C | 3.127073  | -3.336113 | -0.313861 |
| C  | 3.561349  | 1.102338  | -1.799986 | H | 1.739716  | -1.357242 | -2.699429 |
| H  | 2.802605  | 1.346417  | -2.543134 | H | 3.872138  | -1.699150 | -1.492179 |
| C  | -2.219963 | 1.097742  | 1.297628  | H | -0.083202 | -4.509998 | -0.312273 |
| C  | -2.310773 | 0.765989  | 2.658978  | H | 2.099733  | -4.965774 | 0.711377  |
| H  | -2.245088 | -0.271667 | 2.977472  | C | 4.394154  | -3.624596 | 0.279297  |
| C  | -2.511323 | 1.757502  | 3.626837  | H | -2.039227 | -3.672302 | -0.951567 |
| H  | -2.588178 | 1.474587  | 4.675549  | H | -2.797463 | -2.658447 | -2.179553 |
| C  | -2.619590 | 3.100567  | 3.251048  | H | -1.861222 | -4.076595 | -2.669242 |
|    |           |           |           | N | 5.428712  | -3.868250 | 0.771197  |

**8** (T<sub>1</sub>)    E<sub>tot</sub> = -1914.7472 a.u.

|    |           |           |           |   |           |           |           |
|----|-----------|-----------|-----------|---|-----------|-----------|-----------|
| Rh | 0.148332  | -0.847044 | -0.482798 | H | -4.195225 | 4.702682  | 1.578194  |
| P  | 1.279681  | 1.254417  | -0.030250 | C | -3.423314 | 3.488842  | -0.040372 |
| P  | -2.164222 | -0.447045 | -0.050440 | H | -3.496912 | 4.281550  | -0.783301 |
| C  | 0.032532  | -2.914988 | -1.148355 | C | -2.938484 | 2.233908  | -0.416348 |
| C  | 0.870358  | 2.064078  | 1.581863  | H | -2.651367 | 2.067847  | -1.453257 |
| C  | 0.939833  | 1.255568  | 2.731381  | C | -3.337630 | -0.807023 | -1.437343 |
| H  | 1.235956  | 0.209441  | 2.642979  | C | -2.831830 | -1.365438 | -2.619897 |
| C  | 0.646936  | 1.779155  | 3.993640  | H | -1.768412 | -1.583202 | -2.692695 |
| H  | 0.715272  | 1.139685  | 4.872069  | C | -3.677803 | -1.633144 | -3.703142 |
| C  | 0.261223  | 3.119754  | 4.124668  | H | -3.267787 | -2.062143 | -4.615864 |
| H  | 0.026368  | 3.529076  | 5.105715  | C | -5.043344 | -1.344888 | -3.612254 |
| C  | 0.174128  | 3.926573  | 2.985202  | H | -5.703857 | -1.551148 | -4.452833 |
| H  | -0.131969 | 4.967615  | 3.075450  | C | -5.557498 | -0.780204 | -2.436724 |
| C  | 0.479333  | 3.404056  | 1.721758  | H | -6.618421 | -0.547852 | -2.361148 |
| H  | 0.401197  | 4.048586  | 0.849119  | C | -4.710489 | -0.507754 | -1.358973 |
| C  | 1.031276  | 2.557010  | -1.323482 | H | -5.121031 | -0.050621 | -0.460196 |
| C  | 0.120607  | 2.309965  | -2.360687 | C | -2.667940 | -1.572919 | 1.329859  |
| H  | -0.442840 | 1.377124  | -2.368359 | C | -1.803015 | -1.650413 | 2.436235  |
| C  | -0.057071 | 3.240247  | -3.392429 | H | -0.893660 | -1.050416 | 2.456504  |
| H  | -0.764561 | 3.031507  | -4.193160 | C | -2.094151 | -2.490802 | 3.515086  |
| C  | 0.677446  | 4.430494  | -3.394302 | H | -1.414857 | -2.533284 | 4.364854  |
| H  | 0.542425  | 5.155364  | -4.195356 | C | -3.250807 | -3.279892 | 3.496289  |
| C  | 1.598131  | 4.681877  | -2.367172 | H | -3.476804 | -3.941322 | 4.331012  |
| H  | 2.180368  | 5.601830  | -2.368839 | C | -4.110739 | -3.217584 | 2.393588  |
| C  | 1.778501  | 3.748752  | -1.342804 | H | -5.008927 | -3.832364 | 2.366898  |
| H  | 2.515627  | 3.944297  | -0.565311 | C | -3.823675 | -2.367745 | 1.318484  |
| C  | 3.140730  | 1.229418  | 0.010068  | H | -4.501100 | -2.342664 | 0.467908  |
| C  | 3.909151  | 1.614439  | 1.119526  | H | -0.080693 | -2.834140 | -2.236908 |
| H  | 3.425619  | 1.962142  | 2.029747  | C | 1.425302  | -2.989138 | -0.765768 |
| C  | 5.308709  | 1.569082  | 1.064862  | C | -0.963511 | -3.883545 | -0.536431 |
| H  | 5.889632  | 1.873184  | 1.934304  | C | 1.853438  | -3.455110 | 0.528058  |
| C  | 5.957727  | 1.147048  | -0.100054 | C | 2.472576  | -2.664056 | -1.694086 |
| H  | 7.045149  | 1.117902  | -0.143104 | C | 3.809129  | -2.769137 | -1.365333 |
| C  | 5.196506  | 0.759546  | -1.211321 | C | 3.189682  | -3.551242 | 0.864467  |
| H  | 5.689590  | 0.425669  | -2.122849 | C | 4.201395  | -3.205756 | -0.070027 |
| C  | 3.801450  | 0.790364  | -1.151596 | H | 2.194915  | -2.343617 | -2.698388 |
| H  | 3.221985  | 0.473738  | -2.018680 | H | 4.571694  | -2.522175 | -2.101656 |
| C  | -2.843103 | 1.187480  | 0.520240  | H | 1.105351  | -3.741439 | 1.264631  |
| C  | -3.235405 | 1.434069  | 1.845418  | H | 3.475324  | -3.904241 | 1.854465  |
| H  | -3.182150 | 0.643101  | 2.590238  | C | 5.573504  | -3.313642 | 0.276284  |
| C  | -3.718614 | 2.693655  | 2.223330  | H | -0.989710 | -3.832797 | 0.557895  |
| H  | -4.024650 | 2.862826  | 3.254607  | H | -1.978477 | -3.664163 | -0.886941 |
| C  | -3.815607 | 3.725560  | 1.284208  | H | -0.735934 | -4.926333 | -0.813948 |
|    |           |           |           | N | 6.710193  | -3.402307 | 0.562255  |
